# Supplementary material
Source: PubMed Central journal article supplement (PMC4285995)
Supplement: JB.02292-14_zjb999093465so1.pdf [file JB.02292-14_zjb999093465so1.pdf]

## Supplemental Material

### Identification of a novel matrix protein that promotes biofilm maturation in *Vibrio fischeri*

Valerie A. Ray\*, Adam Driks, and Karen L. Visick#

Department of Microbiology and Immunology, Health Sciences Division, Loyola  
University Chicago

#Corresponding author

Department of Microbiology and Immunology

Health Sciences Division

Loyola University Chicago

2160 S. 1<sup>st</sup> Ave., Bldg. 105 Rm. 3933

Maywood, IL 60153

kvisick@luc.edu

(708) 216-0869

(708) 216-9574 (fax)

\*Current address

Center for Microbial Interface Biology/Microbial Infection and Immunity

The Ohio State University

460 W. 12th Ave

Columbus, OH 43210

valerie.ray@osumc.com

**Fig. S1A**

BmpA MYQFFK**I**TMLI**LL**LV**SS**SKV-----FA**V**AFD**S**CP**S**KAYLFQ**G**KPV**S**--V**Y**GIN**L**VT**G**T**N**SL 53  
BmpB **M**K**S**K**H**S**I**SY**L**AT**L**SIALGVSTQL**Q**AA**V**PF**E**SC**P**S**Q**AF**M**L**Q**N**P**SG**T**PI**A**Y**G**I**S**L**D**V**G**SY**S**T 60  
BmpC **M**K**Y**Q**L**I**P**I**I**ALATAS**I**PI**H**-----**A**T**I**V**D**L**D** 27  
\* \* . : : : .

BmpA L**Q**DD**T**G**L**SS**N**ING**V**GF**N**ET**D**RY**I**Y**G**FD**T**T**N**Y**N**V**V**RL**G**Q**N**F**Q**AT**T**L**N**V**N**GL**P**S-D**K**T**F**Y**V**G 112  
BmpB **L**S**E**V**G**-**S**G**K**IN**A**V**G**Y**S**V**H**DD**F**I**Y**G**W**D**Y**G**A**Q**S**L**T**K**I**G**S**D**F**I**S**N**P**L**S**V**S**N**L**N**I**G**P**T**S**F**Y**V**G** 119  
BmpC **F**S**N**H**I**ED**T**N**L**N**S**F**G**P**S**Y**D**G**P**V**M**H**F**L**N**V**G**V**H**N**G**K**T**I**D**A**K**I**S**S**R**I**I**G**D**A**T**F**L**Y**H**T**P**N**Y**K**E**G 87  
: . . : . \* . \* . . : : : . : . : : : . : : . : \*

BmpA **D**V**Y**D**H**H--**Y**V**Y**R**S**G**T**G-----**L**Y**K**I**D**L**S**P**L**D**S**N**V**N**S**T**L**T**A**Q**L**I**T**S**T**A**S**V**S**L**T**D**F**A**F**H**P**S 165  
BmpB **D**V**S**T**N**E**S**A**W**Y**G**Y**R**I**N**G-----**L**F**K**I**D**I**D**T**L**T**M**S**Q**V**A**T**S**-----**T**T**I**G**K**L**R**I**L**D**M**A**F**H**P**D 169  
BmpC **S**T**Q**P**S**G**D**I**G**F**L**Y**Q**T**N**S**P**G**P**A**G**L**I**Y**T**F**E**F**F**D**G**T**D**G**L**S**G**T**F**S**I**P**Y**T**I**P**E**F**E**M**I**G**Y**D**I**D**E**G**P**V 147  
. . : \* : . . : : : : . . \* . . : : \* : . \*

BmpA **N**S**R**L**Y**G**V**D**N**G**S**G**G**L**Y**E**F**D**I**N**T**G**A**T**Y**I**G**-----**D**T**G**E**L**G**T**F**G**A**M**Y**F**D**V**D**G**Y**L**Y**L**S**R**N**Q**D 219  
BmpB **D**G**I**I**Y**S**V**D**N**-**Y**G**Y**L**Y**Q**I**D**P**T**T**G**A**S**T**Q**L**N**Q**V**I**S**S**S**G**V**G**H**S**L**S**F**G**A**Q**Y**F**D**V**D**G**T**L**Y**L**S**N**N**G**N 228  
BmpC **Q**S**E**Q**V**R**V**Y**K**N**E**G**F**F**S**Y**Q**T**G**S**A**G**A**S**L**T**A**E**E**S**P**D**G**L**S**V**L**F**T**G**P**G**T**N**Y**N**E**T**D**T**S**G**A**V**K**F**T**Y**K**N 207  
: . \* : \* : : : \* : : . . . . . : :

BmpA **G**Q**I**Y**R**V**N**L**S**T**Q**A**I**I**D**S**G**V**V**P**A**I**K**F**A**D**G**P**Y**S**N**Q**N**D**G**A**R**C**A**N**A**P**L**I**D**T**D**E**P**A**T**I**D**F**G**D**A**P**D**T 279  
BmpB **G**Y**I**Y**A**V**D**I**N**G---**M**N**S**---**S**S**E**F**F**A**Y**G**P**S**S**N**S**N**D**G**A**R**C**A**F**A**A**V**G**Q**N**D**N**---**S**D**Y**G**D**A**P**D**S** 279  
BmpC **T**S**I**V**T**L**Q**F**E**T**V**T**A**S**N**S**P**L**P**N**P**I**F**S**A**F**D**G**N**W**D**L**D**----**F**T**P**I**G**S**S**D**E**---**S**D**F**G**D**A**P**D**S** 260  
\* : : : . : \* . \* . : : \* . . : : \* : \* : \* : \* :

BmpA **N**Y**G**T**T**L**A**A**N**G**A**R**H**E**M**D**G**V**T**W**L**G**A**S**V**D**G**D**Y**Y--**A**A**Q**S**P**D**S**D**D**S--**I**T**S**D**E**D**E**D**G**V**G**F**V**T**A**I**E**P 336  
BmpB --**Y**G**T**L**Y**D**S**M**G**A**R**H**G**V**S**D**L**R--**L**G**D**V**V**D**G**E**S**D--**A**Y**V**Y**P**L**S**D**D**A**S**D**S****S**N**D**D**D**G**I**S**F**P**V**P**I**E**I** 335  
BmpC --**Y**N**T**L**K**S**N**D**G**A**E**H**A**M**T**S**T**L**Y**L**G**S**V**D**A**D**T**D**G**Q**P**G**I**A**S**N**G**D**D**L**D**V**D**G**N**D**D**D**G**I**T**I**L**T**S**L**E**K 319  
\* . \* \* . \* . : . \* \* \* . : . . \* \* . : : \* : \* : \* : \* :

BmpA **G**L**D**S**V**I**T**V**N**A**S**---**T**T**G**Y**L**S**A**W**F**D**W**N**D**D**G**D**F**S**D**D**G**E**Q**V**I**T**D**K**T**L**V**A**G**S**N**N**L**V**I**S**V**P**F**G**A**T 393  
BmpB **Q**E**T**S**F**I**Y**A**N**V**N**G**A**E**G**E**G**V**L**S**A**W**I**D**W**D**Q**D**G**Q**F**N**D**--**E**I**I**L**N**S**E**W**V**D**D**G**Q**N**Q**L**Y**F**N**V**P**S**W**A**L** 394  
BmpC **G**L**D**A**L**I**N**V**N**A**S**---**G**S**G**Y**L**Q**A**W**A**D**W**D**M**N**G**S**F**D**E**G--**E**Q**I**L**T**N**H**P**I**V**S**G**V**Q**I**V**P**I**R**V**S**D**A**T 375  
: . \* . \* . . \* \* . \* \* \* : : \* . \* . . \* : : : : \* . \*

BmpA **V**G**E**T**S**R**F**R**F**S**Q**Q**T**G**L**A**Y**Y**G**G**S**T**S**G**E**V**E**D**H**V**V**T**I**V**D**A**N**T**S**Q**R**H**F**P**S**A**D**G**V**T**I**A**Y**E**D**N**W**P 453  
BmpB **A**G**T**T**W**A**R**F**R**L**S**R**T**Y**D**L**G**P**N**G**G**V**S**M**G**E**V**E**D**Y**Q**V**T**V**T**D**Q**G**V**S**V**E**L**Y**P**S**G**A**A**Y**T**F**A**Y**E**D**Q**Y**P** 454  
BmpC **I**G**S**V**Q**T**R**F**R**L**S**N**P**N**I**P**S**S**G**Y**V**D**G**E**V**E**D**Y**V**F**D**V**T**D**P**G**T**T**I**Q**H**S---**G**Y**Y**T**A**F**E**D**N**W**P** 431  
\* . : \* \* : \* . : \* \* \* \* : . : . \* . . . . \* \* \* \* \* : \*

BmpA **E**T**A**D**Y**D**M**N**D**M**V**L**R**Y**R**I**T**E**T**L**K**D**G**D**V**A**K**V**S**I**S**G**Q**L**V**A**V**G**A**S**Y**H**S**G**F**A**V**R**L**A**G**I**D**A**T**N**I**D**S**D 513  
BmpB **K**V**G**D**Y**D**M**N**D**V**L**M**N**V**K**Y**T**E**Y**S**H**S**N**K**V**I**Q**L**R**I**D**G**Q**V**A**L**G**G**T**Y**R**S**G**F**A**I**R**L**P**G**I**S**P**S**K**I**K**S**A** 514  
BmpC **E**I**G**D**F**D**L**N**D**V**V**A**Y**Y**R**T**T**I**V**S**K**D**G**E**V**L**R**F**D**I**T**G**T**I**M**A**Y**G**A**S**Y**G**N**G**L**G**W**K**L**N**G**F**S**E**S**D**I**N**L**S 491  
: . \* : \* : \* : : : \* : . . . \* : . \* \* : \* \* : \* \* . \* : . : \* \* : . \* .

BmpA **K**T**R**L**Y**Y**N**S**A**L**Q**D**G**N**A**Q**E**S**G**M**T**E**A**S**F**I**V**I**N**D**A**I**E**V**S**Y**N**-----**C**Y**F**F**R**T**L**D**D**C**R**E 563  
BmpB **S**V**K**L**I**I**D**G**E**L**Q**N**T**E**V**V**E**S**G**T**T**D**A**V**L**I**V**H**E**D**L**W**S**F**T**E**S**G**E**-----**E**E**G**C**Y**M**F**R**T**Q**L**G**C**G**T** 568  
BmpC **L**A**R**L**E**K**N**G**V**T**R**A**N**I**S**P**F**T**G**E**D**K**S**I**A**S**P**G**D**L**V**V**V**A**S**L**N**L**R**E**D**I**I**N**E**E**C**K**F**H**R**T**N**P**S**C**S**A 551  
. : \* : . : : \* : . : \* . . . . \* : : \* \* . \*

BmpA **D**V**G**---**V**E**F**E**L**N**F**S**L**I**T**---**P**V**T**T**G**S**M**P**A**M**P**Y**D**P**F**L**Y**A**T**-**P**G**F**Y**H**G**P**S---**F**A**Q**A**P**G**R**S 612  
BmpB **Q**H**R**---**P**S**W**T**L**I**I**P**F**E**Q**---**P**I**S**Q**S**Q**M**P**D**F**P**Y**D**P**F**I**F**A**T**-**P**G**Y**Y**H**G**N**D**G**L**L**V**S**G**G**H**P**G**R**G 621  
BmpC **S**L**E**S**E**Q**M**T**F**S**I**S**L**P**F**N**D**G**S**E**P**S**V**S**L**L**P**L**N**G**A**D**P**F**I**F**A**G**Y**G**L**Y**H**G**S**----**F**S**T**A**P**G**T**D 607  
. : : : : \* . : \* \* \* : \* : \* \* \* . . \* \* .



Fig. S2

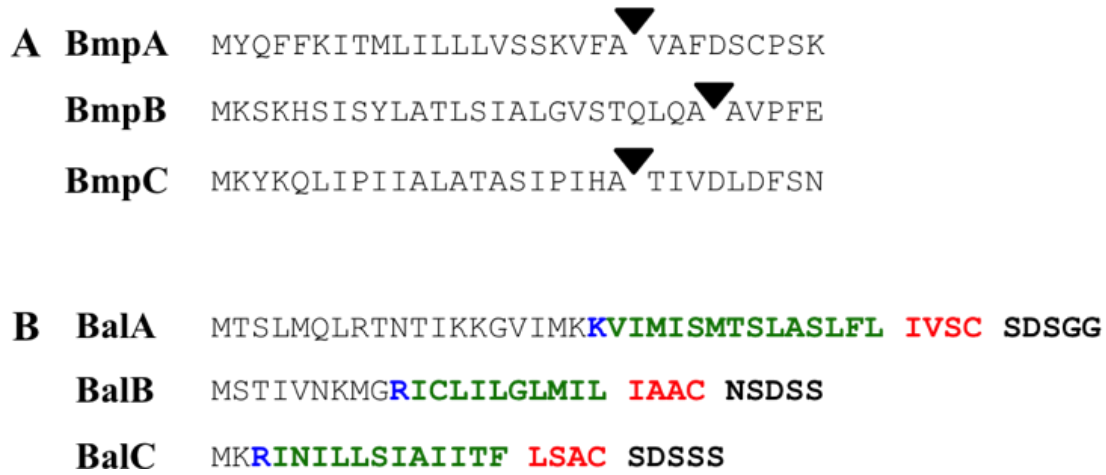

**Figure S2. Putative signal sequences of the Bmp and Bal proteins.** (A) Signal sequence prediction program SignalP (4) predicts the presence of a signal sequence at the N-termini of BmpA, BmpB, and BmpC. The inverted triangle indicates the predicted site of cleavage. (B) The Database of Bacterial Lipoproteins (DOLOP) (5) predicts that the Bal proteins are lipoproteins based on the presence of the following sequences: a charged residue (blue), followed by a hydrophobic stretch of amino acids (green), and a lipobox sequence ending in an cysteine residue (red); bold black sequences after the invariant cysteine do not appear to contain an inner membrane retention signal (6).

Fig. S3A

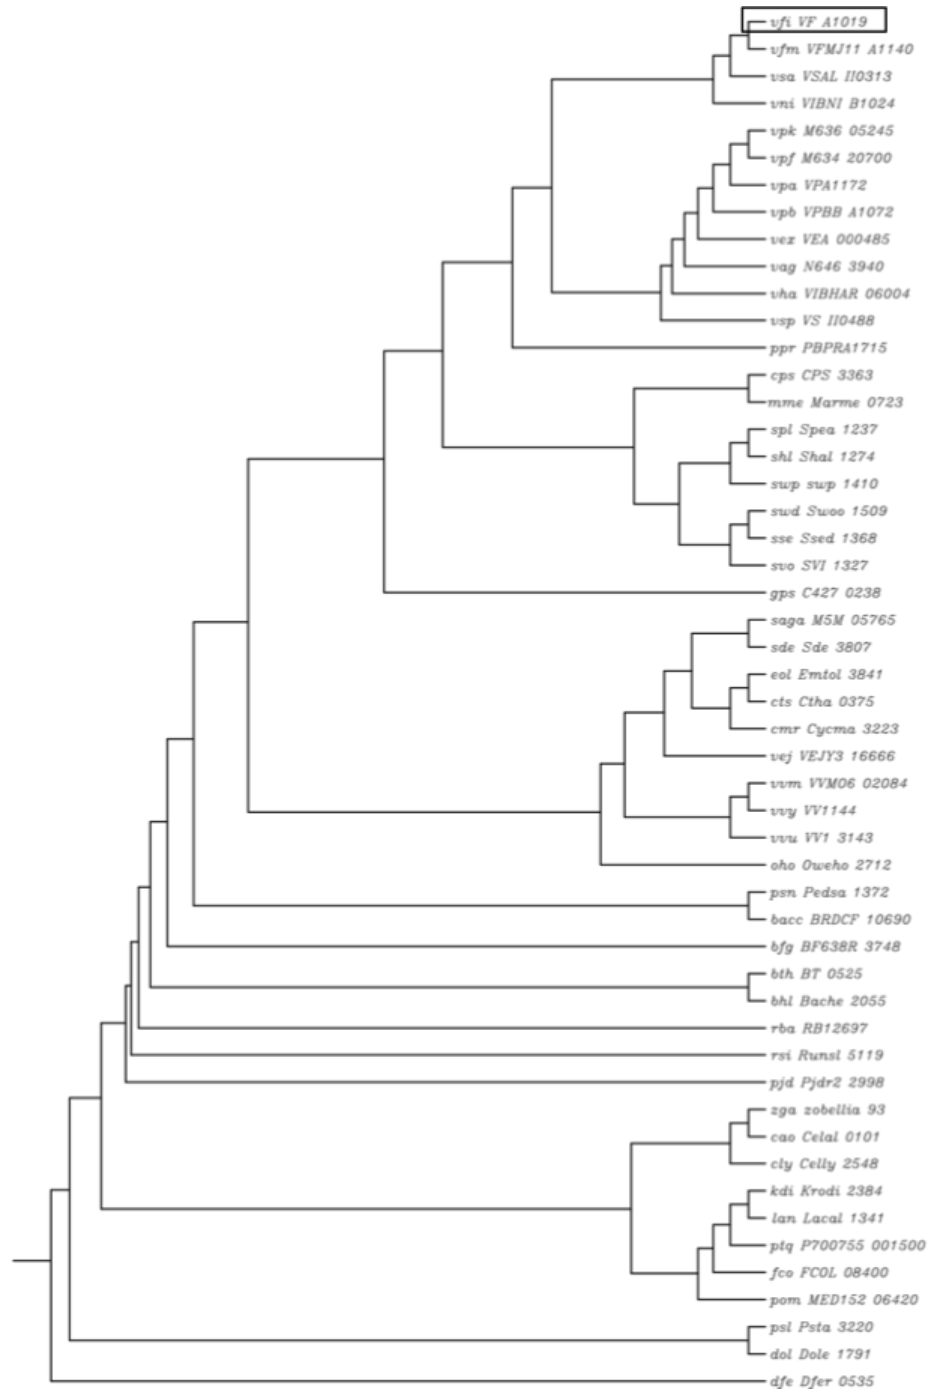

Fig. S3B

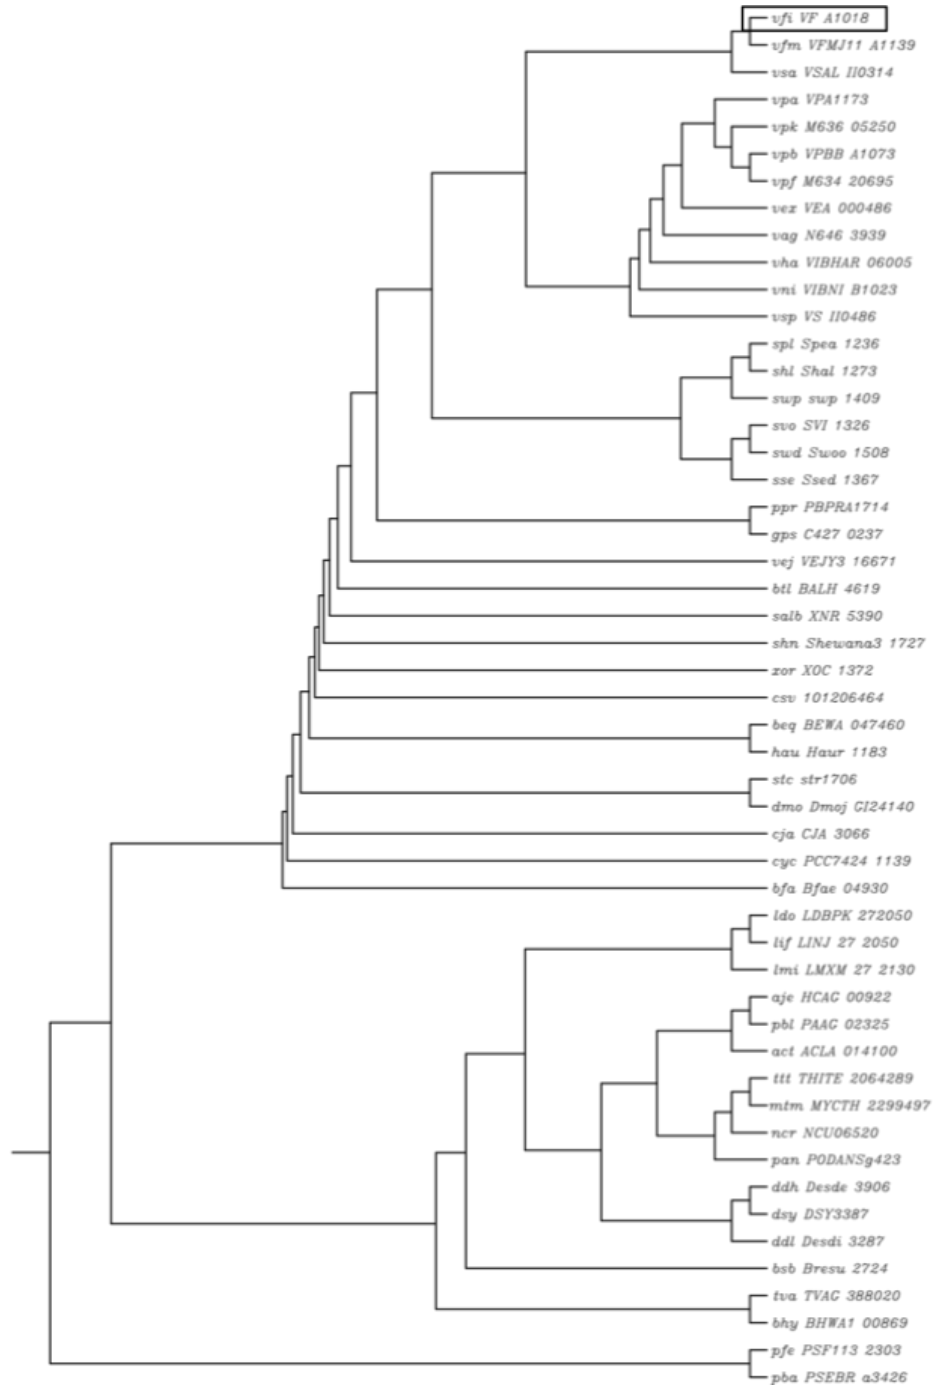

**Figure S3. Conservation of Bmp and Bal in other bacteria.** Conservation of the (A) Bmp protein and (B) the Bal protein in other bacteria. Sequences of BmpA and BalA, respectively, were submitted to KEGG (7, 8) for comparison with other proteins. The indicated trees were generated with a subset of the conserved proteins with the *V. fischeri* protein boxed for reference in each tree.

Fig. S4

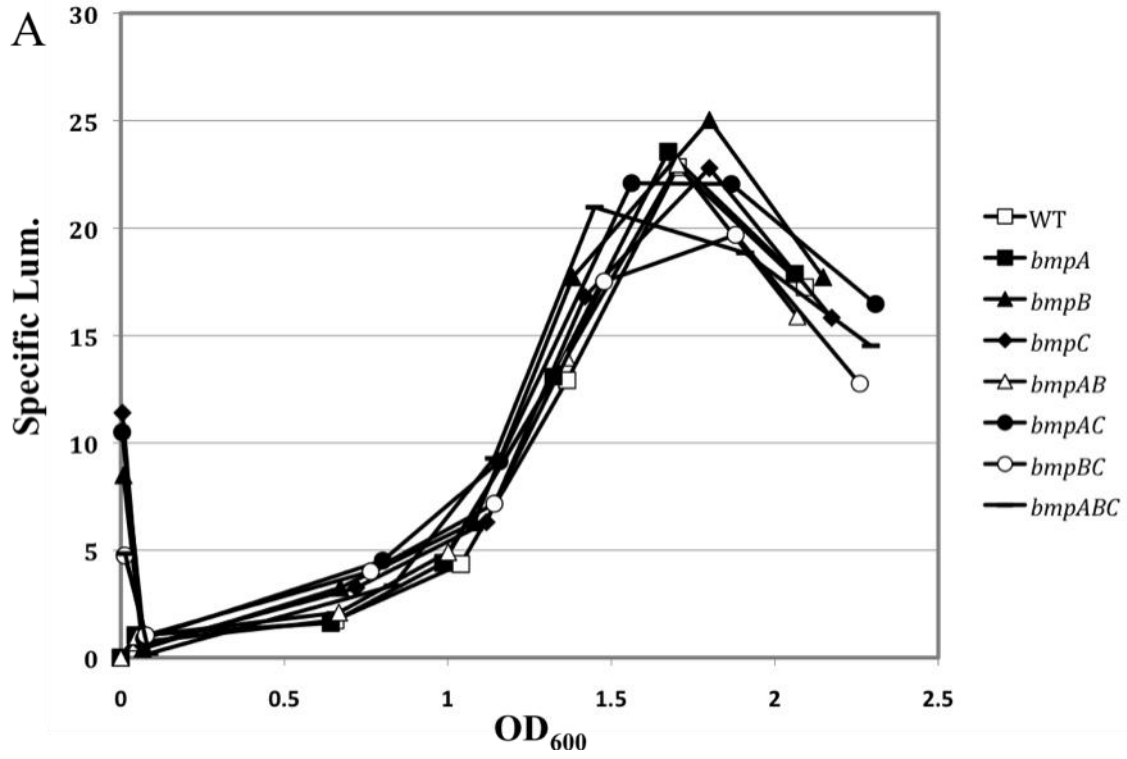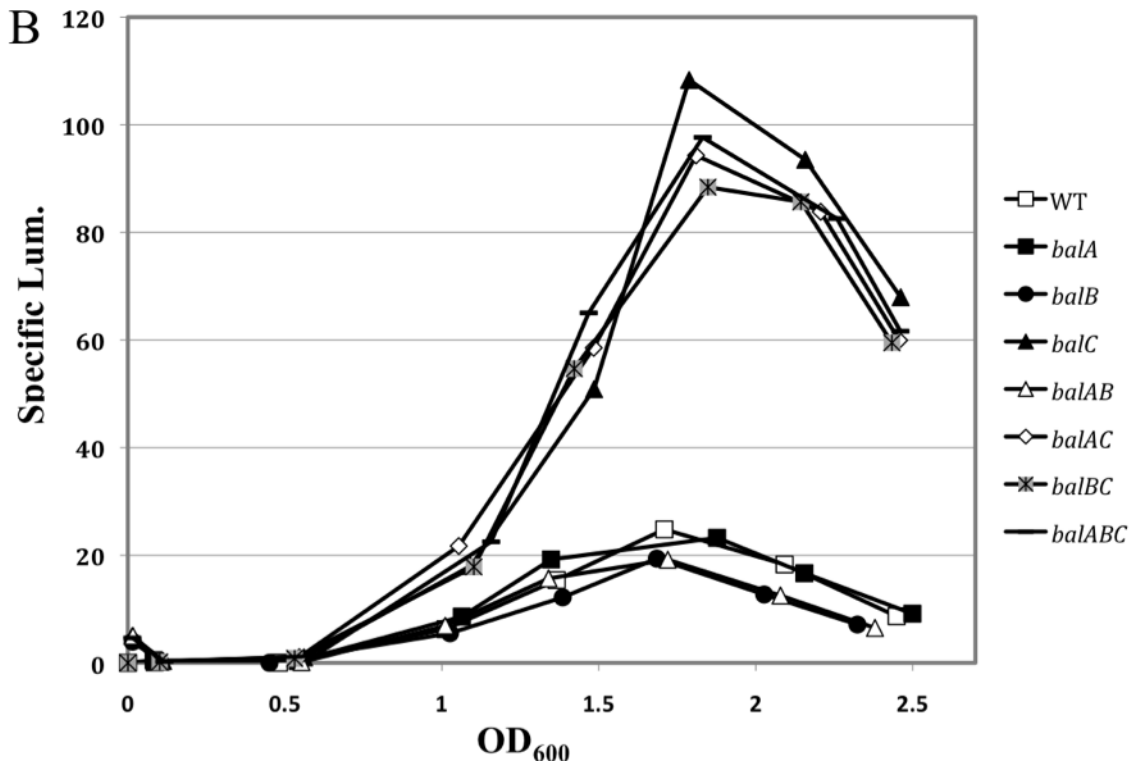



**Figure S4. Luminescence of the *bmp* and *bal* mutants.** The impact of *bmp* and *bal* mutations on bioluminescence was assessed by growing single, double, and triple *bmp* mutants and the wild-type control in SWTO, monitoring luminescence over time, and calculating specific luminescence as described in Materials and Methods. (A) The strains assessed are as follows: wild-type (ES114),  $\Delta bmpA$  (KV6886),  $\Delta bmpB$  (KV6638),  $\Delta bmpC$  (KV6787),  $\Delta bmpAB$  (KV7078),  $\Delta bmpAC$  (KV7079),  $\Delta bmpBC$  (KV6712), and  $\Delta bmpABC$  (KV6897). (B) The strains assessed are as follows: wild-type (ES114),  $\Delta balA$  (KV6890),  $\Delta balB$  (KV6924),  $\Delta balC$  (KV6923),  $\Delta balAB$  (KV7080),  $\Delta balAC$  (KV7081),  $\Delta balBC$  (KV7369), and  $\Delta balABC$  (KV7128). These data are representative of at least two independent experiments.

**Fig. S5**

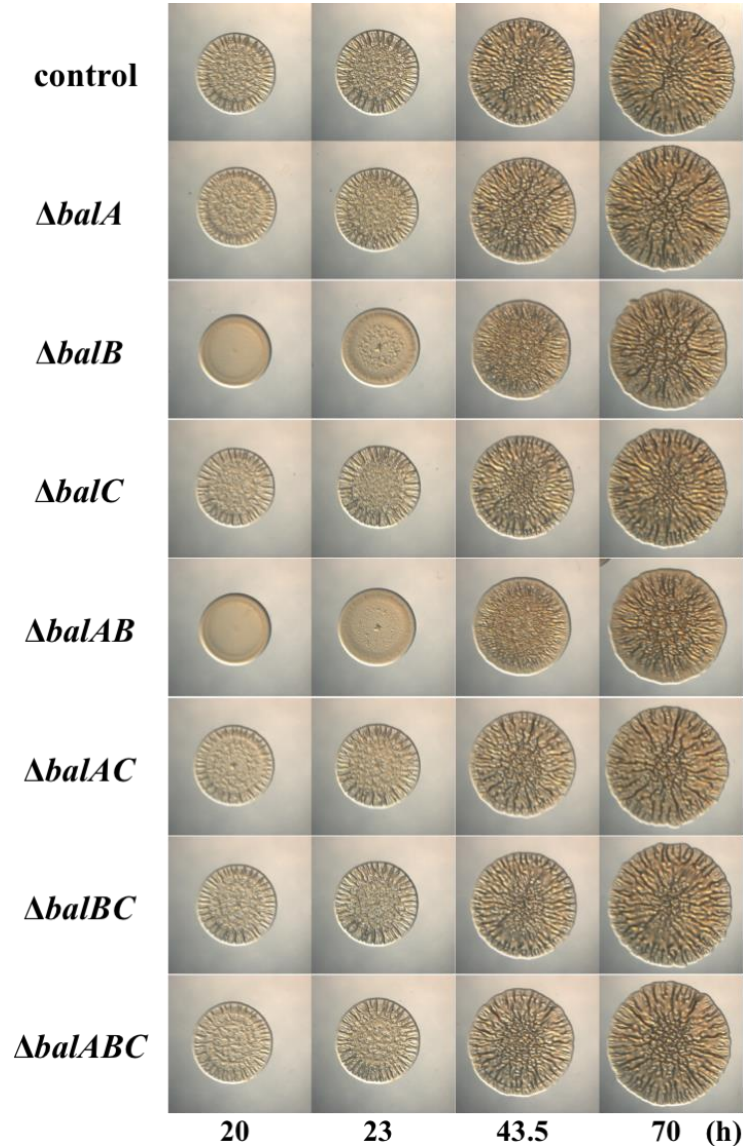

**Figure S5. Impact of *bal* mutations on biofilm formation.** To assess the impact of *bal* on biofilm formation, we spotted cultures of various *bal* mutants onto LBS medium containing Tc and incubated them at room temperature. All strains overexpressed *rscS*. Images were collected up to 70 h for the following strains: wild-type control (ES114),  $\Delta balA$  (KV6890),  $\Delta balB$  (KV6924),  $\Delta balC$  (KV6923),  $\Delta balAB$  (KV7080),  $\Delta balAC$  (KV7081),  $\Delta balBC$  (KV7369), and  $\Delta balABC$  (KV7128). The images are representative of at least two independent experiments.

**Fig. S6**

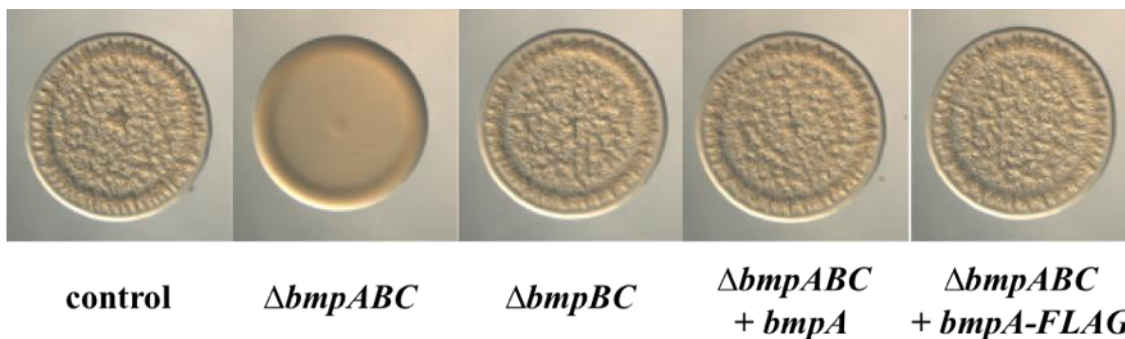

**Figure S6. The biofilm defect of the *bmp* mutant can be complemented by *bmpA*.** The ability of the *bmpA-balA* operon or *bmpA-FLAG* to complement the triple *bmp* mutant was assessed via wrinkled colony formation. In the experiment shown, cultures were spotted onto LBS medium containing Tc and incubated at room temperature for 22 h. The strains assessed were pKG11-containing derivatives of: wild-type (control; ES114),  $\Delta bmpABC$  (KV6897),  $\Delta bmpBC$  (KV6712),  $\Delta bmpABC$  *attTn7::bmpA-balA* (KV7062), and  $\Delta bmpABC$  *attTn7::bmpA-FLAG* (KV7274). The images are representative of at least two independent experiments.

**Fig. S7**

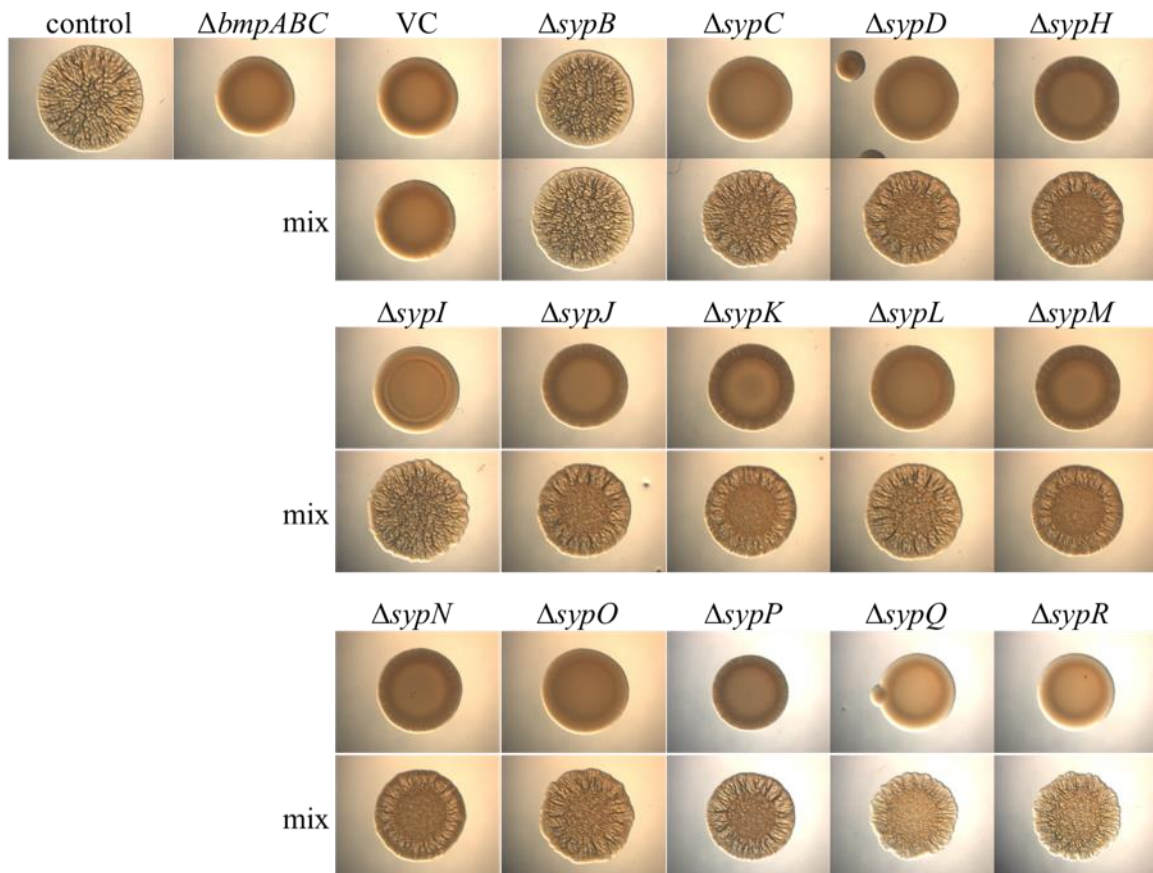

**Figure S7. A mixture of biofilm-defective *bmp* and *syp* strains permits wrinkled colony formation.** We assessed the ability of each of the biofilm-defective *syp* mutants to complement the *bmp* mutant for wrinkled colony formation by spotting, onto LBS medium containing Tc, a mixture of the pKG11-containing  $\Delta bmpABC$  mutant with each of the following pKG11-containing *syp* mutant strains:  $\Delta sypB$  (KV5145),  $\Delta sypC$  (KV5192),  $\Delta sypD$  (KV5067),  $\Delta sypH$  (KV5193),  $\Delta sypI$  (KV5068),  $\Delta sypJ$  (KV5664),  $\Delta sypK$  (KV5097),  $\Delta sypL$  (KV5069),  $\Delta sypM$  (KV5194),  $\Delta sypN$  (KV5098),  $\Delta sypO$  (KV5146),  $\Delta sypP$  (KV5044),  $\Delta sypQ$  (KV5099), and  $\Delta sypR$  (KV5195). As controls, we spotted each strain separately as well as the biofilm-proficient pKG11-containing wild-type strain ES114. In the experiment shown, cultures were spotted onto plates and incubated at room temperature for 48 h.

**Fig. S8**

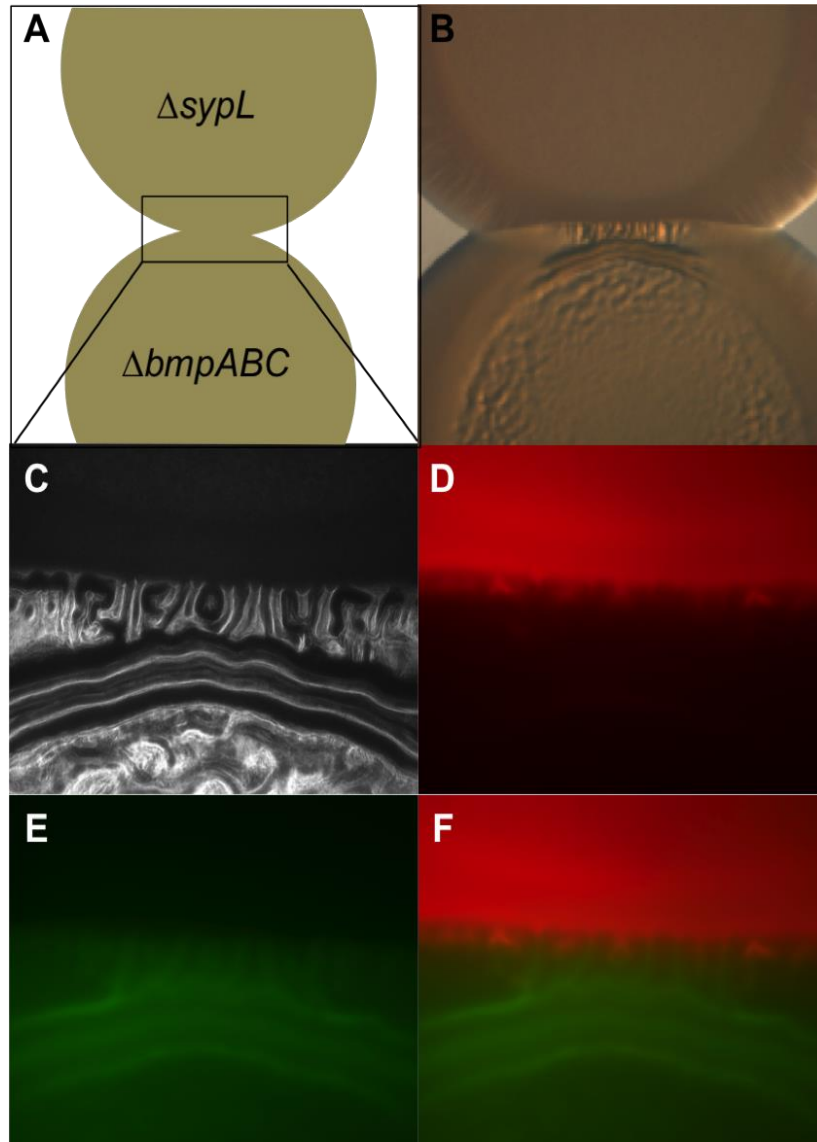

**Figure S8. Evaluation of the interface of touching spots using epifluorescence.** To further examine the interface of touching spots, we utilized epifluorescence microscopy and the pARM7-containing  $\Delta sypL$  (KV5069) and  $\Delta bmpABC$  (KV6897) strains also harboring either constitutively expressed RFP (pVSV208) or GFP (pESY37) plasmid, respectively. Cultures were spotted onto plates and incubated at room temperature for 43 h. (A) A diagrammatic representation of the experiment and (B) the touching spots used to collect the epifluorescence data. (C) A DIC image of the interface, (D) the RFP channel only, (E) the GFP channel only, and (F) a merge of the RFP and GFP channels. Some mixing of the two strains is observed at the interface (F), but there does not appear to be a massive invasion. Images are representative of 2 independent experiments. Magnification for images (C-F) is at 40x.

**Table S1. Strains used in the supplemental material.**

| Strains | Genotype                              | Reference  |
|---------|---------------------------------------|------------|
| KV3299  | $\Delta sypE$                         | (9)        |
| KV4715  | $\Delta sypA$                         | (10)       |
| KV5044  | $\Delta sypP$                         | (11)       |
| KV5067  | $\Delta sypD$                         | (11)       |
| KV5068  | $\Delta sypI$                         | (11)       |
| KV5069  | $\Delta sypL$                         | (11)       |
| KV5097  | $\Delta sypK$                         | (12)       |
| KV5098  | $\Delta sypN$                         | (11)       |
| KV5099  | $\Delta sypQ$                         | (11)       |
| KV5145  | $\Delta sypB$                         | (11)       |
| KV5146  | $\Delta sypO$                         | (11)       |
| KV5192  | $\Delta sypC$                         | (11)       |
| KV5193  | $\Delta sypH$                         | (11)       |
| KV5194  | $\Delta sypM$                         | (11)       |
| KV5195  | $\Delta sypR$                         | (11)       |
| KV5664  | $\Delta sypJ$                         | (11)       |
| KV6890  | $\Delta balA$                         | This study |
| KV6923  | $\Delta balC$                         | This study |
| KV6924  | $\Delta balB$                         | This study |
| KV7080  | $\Delta balA \Delta balB$             | This study |
| KV7081  | $\Delta balA \Delta balC$             | This study |
| KV7128  | $\Delta balA \Delta balB \Delta balC$ | This study |
| KV7369  | $\Delta balB \Delta balC$             | This study |

**Table S2. Plasmids used in this study.**

| Plasmid | Description                                                                                     | Relevant Primers <sup>1</sup> | Reference  |
|---------|-------------------------------------------------------------------------------------------------|-------------------------------|------------|
| pARM7   | EcoRI partial digest of pKG11 ( <i>rscS</i> ); tetR                                             | N/A                           | (13)       |
| pEAH73  | pKV69 carrying wild-type <i>sypG</i> ; Cm <sup>R</sup> Tc <sup>R</sup>                          | N/A                           | (9)        |
| pEAH121 | pEVS107 + P <i>sypI</i> - <i>lacZ</i> EmR (FL + SE-I)                                           | N/A                           | (14)       |
| pESY37  | pVSV105 (KpnI) + 1.3 bp BamHI/XmnI fragment from pKV111 containing <i>gfp</i> ; Cm <sup>R</sup> | N/A                           | (15)       |
| pEVS104 | Conjugal helper plasmid ( <i>tra trb</i> ); Kn <sup>R</sup>                                     | N/A                           | (16)       |
| pEVS107 | Mini-Tn7 delivery plasmid; <i>oriR6K</i> , <i>mob</i> ; Kn <sup>R</sup> , Em <sup>R</sup>       | N/A                           | (17)       |
| pKG11   | pKV69 carrying <i>rscS1</i> allele; Cm <sup>R</sup> Tc <sup>R</sup>                             | N/A                           | (15)       |
| pKV69   | Cm <sup>R</sup> , Tc <sup>R</sup> , <i>mob</i> , <i>oriT</i>                                    | N/A                           | (18)       |
| pKV363  | Cm <sup>R</sup> , <i>oriT</i> , <i>oriR6K</i> , <i>ccdB</i>                                     | N/A                           | (11)       |
| pKV485  | pKV363 containing 1.2 kb sequencing flanking <i>bmpB</i>                                        | 1536, 1537, 1538, 1539        | This study |
| pKV486  | pKV363 containing 1.2 kb sequencing flanking <i>bmpC</i>                                        | 1540, 1541, 1542, 1543        | Thus study |

|         |                                                                                                          |                        |            |
|---------|----------------------------------------------------------------------------------------------------------|------------------------|------------|
| pVAR77  | pKV363 containing 1.2 kb sequencing flanking <i>bmpA</i>                                                 | 1532, 1533, 1675, 1535 | This study |
| pVAR78  | pKV363 containing 850 bp sequencing flanking <i>balA</i>                                                 | 1659, 1676, 1661, 1662 | This study |
| pVAR80  | pKV363 containing 1.2 kb sequencing flanking <i>balC</i>                                                 | 1665, 1666, 1667, 1668 | This study |
| pVAR81  | pKV363 containing 1.2 kb sequencing flanking <i>balB</i>                                                 | 1669, 1670, 1671, 1672 | This study |
| pVAR88  | pEVS107 containing ~2.8 kb fragment with the native <i>bmpA</i> promoter and <i>bmpA</i> and <i>balA</i> | 1754, 1755             | This study |
| pVAR94  | pEVS107 containing ~2.5 kb fragment with <i>bmpA</i> with a C-terminal FLAG-tag                          | 1754, 1644, 1830       | This study |
| pVAR95  | pEVS107 containing ~2.5 kb fragment with <i>bmpA</i>                                                     | 1754, 1833             | This study |
| pVAR96  | pEVS107 containing ~3.3 kb fragment with the native <i>bmpA</i> promoter fused to <i>lacZ</i>            | 1754, 1821, 1824, 1827 | This study |
| pVAR97  | pEVS107 containing ~3.3 kb fragment with the native <i>bmpC</i> promoter fused to <i>lacZ</i>            | 1758, 1823, 1826, 1827 | This study |
| pVSV105 | Mobilizable vector, Cm <sup>R</sup>                                                                      | N/A                    | (19)       |
| pVSV208 | Cm <sup>R</sup> , <i>rfp</i>                                                                             | N/A                    | (19)       |

<sup>1</sup>Relevant primers for plasmids generated in this study; N/A, not applicable.

**Table S3. Primers used in this study.**

| Number | Primer <sup>1</sup>                                          |
|--------|--------------------------------------------------------------|
| 1532   | AAGGCTACGTGTGATAAATCG                                        |
| 1533   | taggcggccgcacttagtatgTGAGCTGACTAATAAAAAGTATTAG               |
| 1535   | CCATCTCACGAATCTAACTCTTC                                      |
| 1536   | TCACGTTGCCACCTAGTGC                                          |
| 1537   | taggcggccgcacttagtatgCGTTGCAAGATAGGATATTGAGTG                |
| 1538   | catactaagtgcggccgcctaGGCAAGGCTTATACAGATTAAGGAG               |
| 1539   | CGTGGCAACTTCTGTGTGG                                          |
| 1540   | CGATTATGGCTCGGAAGCC                                          |
| 1541   | taggcggccgcacttagtatgCGCAGTAGCGAGGGCAATAATCGG                |
| 1542   | catactaagtgcggccgcctaAATACTTGGTCAACAGCTGACTAAC               |
| 1543   | GAGCTCCTTGTATTGCTTGG                                         |
| 1644   | ggtaccttatttatcatcatcatctttataatcATAGTATTTGTTTCGCAATTGCATTAG |
| 1659   | GATTGTCGAGAAGATGTCGG                                         |
| 1661   | catactaagtgcggccgcctaGAATGGTATTAACTTAAAATAATAC               |
| 1662   | GCCGAATTATCCGTTACAATTG                                       |
| 1665   | GCATCACTTGAATCAGAGCAG                                        |
| 1666   | taggcggccgcacttagtatgGATACTTAGTAATATATTAATTCG                |
| 1667   | catactaagtgcggccgcctaGCCACTTTATAAACATCATTAAGC                |
| 1668   | CCCAGTTGGACGTACACGC                                          |
| 1669   | GGTTGTGGTACTCAACATCG                                         |
| 1670   | taggcggccgcacttagtatgACAAATGCGACCCATTTTATTTAC                |

|      |                                                   |
|------|---------------------------------------------------|
| 1671 | cataactaagtgcggccgcctaATTAATTAAAGAGACAAAAATGCC    |
| 1672 | GAGATCGGTGTTGATGGGATC                             |
| 1675 | cataactaagtgcggccgcctaGCAGACTATACGACGTCAGGCGGT    |
| 1676 | taggcccgcgcacttagtatgCATAATAACTTTTTTCATAATAAC     |
| 1754 | gatctactagtgccaggtaccCGATGATATATTCTCAATTTGCAAT    |
| 1755 | ccagtctagttctagagggcccCTCACATGTATTATTTTAAGTTA     |
| 1758 | gatctactagtgccaggtaccGTAAAATTTATATTCTCATATTGATTC  |
| 1798 | gccttgcgataaatatttgcccatggAAGTCGATTCTCATTCTGCAA   |
| 1799 | gccttgcgataaatatttgcccatggCTGCATTGCAAATTGAGAATATA |
| 1800 | gattacgccaagcttgcatgcCTGCAGGAATTCGAGCTCGGTACC     |
| 1821 | tcctgtgtgaTGAGCTGACTAATAAAAAGTATTAG               |
| 1823 | tcctgtgtgaCGCAGTAGCGAGGGCAATAATCGG                |
| 1824 | agtcagctcaTCACACAGGAAACAGCTATGAC                  |
| 1826 | cgctactgcgTCACACAGGAAACAGCTATGAC                  |
| 1827 | ccagtctagttctagagggcccGTACATAATGGATTTCTTACGC      |
| 1827 | ccagtctagttctagagggcccGTACATAATGGATTTCTTACGC      |
| 1830 | ccagtctagttctagagggcccTTATTTATCATCATCATC          |
| 1833 | ccagtctagttctagagggcccCTTTTTAATAGTATTTGTTCGCAAT   |

<sup>1</sup>Non-native sequences are indicated with lower-case letters

## Supplemental Methods

**Luminescence assays.** *V. fischeri* cultures were grown in LBS overnight at 24°C with shaking, then diluted to an optical density at 600 nm (OD<sub>600</sub>) of ~0.01 in 30 ml of SWTO and incubated at 24°C with vigorous shaking. Samples were taken every 30-60 minutes. At each time point, bioluminescence (using a Turner Designs TD-20/20 luminometer at the factory settings and a large, clear scintillation vial) and OD<sub>600</sub> (using a cuvette) were measured for each sample. Maximum luminescence was observed at OD<sub>600</sub> measurements between 1.5 and 2 for all strains. Specific luminescence was calculated as relative luminescence (the relative light units of 1 ml of culture integrated over a 6-second count) divided by the OD<sub>600</sub>.

**Epifluorescent microscopy.** Spots were made per Materials and Methods in the main body of the text. DIC and epifluorescent images were captured using an Optronics MagnaFire S60800 CCD Microscope Camera attached to a Leica DMIRB with a Prior Lumen 200 light source. Images are at 40x magnification (4x objective lens and 10x eyepiece). Images were processed using ImageJ.



## References

1. **Larkin MA, Blackshields G, Brown NP, Chenna R, McGettigan PA, McWilliam H, Valentin F, Wallace IM, Wilm A, Lopez R, Thompson JD, Gibson TJ, Higgins DG.** 2007. Clustal W and Clustal X version 2.0. *Bioinformatics* **23**:2947-2948.
2. **Goujon M, McWilliam H, Li W, Valentin F, Squizzato S, Paern J, Lopez R.** 2010. A new bioinformatics analysis tools framework at EMBL-EBI. *Nucleic Acids Res* **38**:W695-699.
3. **McWilliam H, Li W, Uludag M, Squizzato S, Park YM, Buso N, Cowley AP, Lopez R.** 2013. Analysis Tool Web Services from the EMBL-EBI. *Nucleic Acids Res* **41**:W597-600.
4. **Petersen TN, Brunak S, von Heijne G, Nielsen H.** 2011. SignalP 4.0: discriminating signal peptides from transmembrane regions. *Nat Methods* **8**:785-786.
5. **Babu MM, Priya ML, Selvan AT, Madera M, Gough J, Aravind L, Sankaran K.** 2006. A database of bacterial lipoproteins (DOLOP) with functional assignments to predicted lipoproteins. *J Bacteriol* **188**:2761-2773.
6. **Tokuda H, Matsuyama S.** 2004. Sorting of lipoproteins to the outer membrane in *E. coli*. *Biochim Biophys Acta* **1694**:IN1-9.
7. **Kanehisa M, Goto S.** 2000. KEGG: kyoto encyclopedia of genes and genomes. *Nucleic Acids Res* **28**:27-30.
8. **Kanehisa M, Goto S, Sato Y, Kawashima M, Furumichi M, Tanabe M.** 2014. Data, information, knowledge and principle: back to metabolism in KEGG. *Nucleic Acids Res* **42**:D199-205.
9. **Hussa EA, Darnell CL, Visick KL.** 2008. RscS functions upstream of SypG to control the *syp* locus and biofilm formation in *Vibrio fischeri*. *J Bacteriol* **190**:4576-4583.
10. **Morris AR, Visick KL.** 2013. The response regulator SypE controls biofilm formation and colonization through phosphorylation of the *syp*-encoded regulator SypA in *Vibrio fischeri*. *Mol Microbiol* **87**:509-525.
11. **Shibata S, Yip ES, Quirke KP, Ondrey JM, Visick KL.** 2012. Roles of the structural symbiosis polysaccharide (*syp*) genes in host colonization, biofilm formation, and polysaccharide biosynthesis in *Vibrio fischeri*. *J Bacteriol* **194**:6736-6747.
12. **Shibata S, Visick KL.** 2012. Sensor kinase RscS induces the production of antigenically distinct outer membrane vesicles that depend on the symbiosis polysaccharide locus in *Vibrio fischeri*. *J Bacteriol* **194**:185-194.
13. **Morris AR, Darnell CL, Visick KL.** 2011. Inactivation of a novel response regulator is necessary for biofilm formation and host colonization by *Vibrio fischeri*. *Mol Microbiol* **82**:114-130.
14. **Ray VA, Eddy JL, Hussa EA, Misale M, Visick KL.** 2013. The *syp* enhancer sequence plays a key role in transcriptional activation by the  $\sigma^{54}$ -dependent response regulator SypG and in biofilm formation and host colonization by *Vibrio fischeri*. *J Bacteriol* **195**:5402-5412.

15. **Yip ES, Geszvain K, DeLoney-Marino CR, Visick KL.** 2006. The symbiosis regulator *rscS* controls the *syp* gene locus, biofilm formation and symbiotic aggregation by *Vibrio fischeri*. *Mol Microbiol* **62**:1586-1600.
16. **Stabb EV, Ruby EG.** 2002. RP4-based plasmids for conjugation between *Escherichia coli* and members of the *Vibrionaceae*. *Methods Enzymol* **358**:413-426.
17. **McCann J, Stabb EV, Millikan DS, Ruby EG.** 2003. Population dynamics of *Vibrio fischeri* during infection of *Euprymna scolopes*. *Appl Environ Microbiol* **69**:5928-5934.
18. **Visick KL, Skoufos LM.** 2001. Two-component sensor required for normal symbiotic colonization of *Euprymna scolopes* by *Vibrio fischeri*. *J Bacteriol* **183**:835-842.
19. **Dunn AK, Millikan DS, Adin DM, Bose JL, Stabb EV.** 2006. New *rfp*- and pES213-derived tools for analyzing symbiotic *Vibrio fischeri* reveal patterns of infection and lux expression *in situ*. *Appl Environ Microbiol* **72**:802-810.
